# Supplementary material
Source: publisher figshare collection journal article supplement (https://tandf.figshare.com/articles/dataset/_/16456019)
Supplement: Supplementary file 1 [file 1]

## Intensity of ICAPs

| ICAP Name                    | Detail                                                                                                                                                                                                                                                                                                                                                                                                                                                                                                                                                                                          |
|------------------------------|-------------------------------------------------------------------------------------------------------------------------------------------------------------------------------------------------------------------------------------------------------------------------------------------------------------------------------------------------------------------------------------------------------------------------------------------------------------------------------------------------------------------------------------------------------------------------------------------------|
| <b>Aphasia House Belfast</b> | Whiteside & Pak Hin Kong (2013) 4 hours of treatment, 4 days/week, 6 weeks.                                                                                                                                                                                                                                                                                                                                                                                                                                                                                                                     |
| <b>Big Sky Montana</b>       | 1-month intensive treatment block. No detail on hours a week or total hours in the article. Personal correspondence with article indicated “4-week over a four-week programme, and 4 to 5 hours daily” (personal communication 22/01/2020).                                                                                                                                                                                                                                                                                                                                                     |
| <b>Big Sky Montana</b>       | Has varied over the years. For <u>PWA</u> : From 3-4.5 hours/day, from 3-4 days a week, from 4-5 weeks. Total hours of intervention from 36-72. <u>Caregivers</u> : Weekly x 1.5 hours for SSLT-led education group (for a total of 5 sessions and 7-8 hours total intervention). Twice a week for counselling - 1.5hour sessions (for a total of 8 sessions and 12 hours treatment).                                                                                                                                                                                                           |
| <b>Boston</b>                | 3 articles all report 6hrs interdisciplinary treatment a day, 5 day/week, 4 weeks for a total of 30hrs weekly treatment. Minor changes in division of hours over the years Hoover and Carney [125] report 15.5 SLT (9.5 group, 3 dyadic, 3 individual), 5hrs OT, 4.5hrs PT, 5hrs nutrition per week. Hoover et al. [96] report 16hours SLP (9.5 group, 3.5 dyadic, 3 individual), 4.5hours OT, 4.5hrs PT, and 5hrs nutrition treatment per week. Escher et al. [123] report OT 1 - 1.5hours daily and additional OT sessions led jointly with other professionals without calculation of hours. |
| <b>Chicago</b>               | 6 hrs/day, 5 days/week, 30 hrs/week x 4 weeks = 120 hours [where 114 are labelled treatment and 6 hours are labelled evaluation]. 6hrs comprised of two 1hr individual sessions and 1hr each of reading/ writing, constraint-                                                                                                                                                                                                                                                                                                                                                                   |

---

|                   |                                                                                                                                                                                                                                                                                                                                                                                                                                                                                                                                                                                                           |
|-------------------|-----------------------------------------------------------------------------------------------------------------------------------------------------------------------------------------------------------------------------------------------------------------------------------------------------------------------------------------------------------------------------------------------------------------------------------------------------------------------------------------------------------------------------------------------------------------------------------------------------------|
|                   | induced language, computer-based, and conversation or interactive group treatments.                                                                                                                                                                                                                                                                                                                                                                                                                                                                                                                       |
| <b>Copenhagen</b> | 20 hours a week for 4 months. No detail on intensity of work trial/placement following the 4-month period.                                                                                                                                                                                                                                                                                                                                                                                                                                                                                                |
| <b>Glasgow</b>    | From 10:00-3:30 5 days a week for 4 weeks. Total hours [excluding testing and a holiday] totalled by articles at about 85. 1 x 40 min individual session a day is the only specific detail.                                                                                                                                                                                                                                                                                                                                                                                                               |
| <b>InteRACT</b>   | 4.5 weeks, 5 hours a day of SLT. 5hrs per day comprised of 1hr 1:1 impairment-based language and motor speech (e.g., MIT), 1hr 1:1 reading/writing e.g., anagram and copy treatment; 1hr 1:1 functional/multimodal communication skills (e.g., PACE); 1hr 1:1 computer skills; and 1hr group treatment for conversation and community integration. 100+ hours of SLT total. Total for other therapies not given but estimates of time with other professionals given in article. Recreation treatment also provided 2-5 hours a week in group/1:1 and physical therapy in group sessions 2 x 1hrs a week. |
| <b>iTAWC</b>      | 5-week intensive. 3 hours daily individual treatment. No detail on group treatment hours.                                                                                                                                                                                                                                                                                                                                                                                                                                                                                                                 |
| <b>LIFT1</b>      | LIFT1 = 40hours over 2 weeks. LIFT 1 = 26hrs 1:1 (imp/fx), 11hrs group, 3hrs challenge task. No hours' calculation for family members.                                                                                                                                                                                                                                                                                                                                                                                                                                                                    |
| <b>LIFT2</b>      | LIFT2 = 100hrs over 4 weeks. LIFT2 = 38hrs 1:1, 23hrs group, 20hrs challenge task, 19hrs comp.                                                                                                                                                                                                                                                                                                                                                                                                                                                                                                            |
| <b>LIFT3</b>      | Intensive arm = 3-4 hr/day x 5 day/week, 16 hours per week; 3 weeks. 48hrs total. 14hrs impairment; 14hrs functional; 14hrs computer-based; 6hrs group treatment. For impairment-based picture naming therapy, dose and                                                                                                                                                                                                                                                                                                                                                                                   |

---

---

|                  |                                                                                                                                                                                                                                                                                                                |
|------------------|----------------------------------------------------------------------------------------------------------------------------------------------------------------------------------------------------------------------------------------------------------------------------------------------------------------|
|                  | cumulative treatment intensity was calculated. Dose: Mean (SD) the number of therapeutic inputs (i.e. number of words treated per session) was 8.5 (1.6). Cumulative intervention intensity: Mean (SD) 118.3 (22.6).                                                                                           |
| <b>Louisiana</b> | 6 weeks. Daily. 9-4pm. 29 days total.                                                                                                                                                                                                                                                                          |
| <b>Milton</b>    |                                                                                                                                                                                                                                                                                                                |
| <b>Keynes</b>    | 25 hrs/week [5hrs x 5 days/week] x 12 weeks.                                                                                                                                                                                                                                                                   |
| <b>Oklahoma</b>  | 4 days a week, 6 hours a day, for approximately 6 months                                                                                                                                                                                                                                                       |
| <b>PIRATE</b>    | 23 days. 25 hours/week of 1:1; 4-6 hours/week group; 1-1.5hrs/week education.                                                                                                                                                                                                                                  |
| <b>UMAP</b>      | Hinckley and Craig [121] report 6 weeks, 23 hours of treatment per week, with 15 hours in individual treatment, 5 hours in small group treatment, and 3 hours in computer lab treatment. Persad et al. [120] also report 23 hours/week x 6 weeks but addition of 1 hour each/ week of music and art treatment. |

---
