# Supplementary material
Source: publisher figshare collection journal article supplement (https://tandf.figshare.com/articles/dataset/_/16456019)
Supplement: Supplementary file 2 [file 1]

## ICAPs reported solely in the Grey literature

|   | Name                                                                         | Geographical location   | Setting                        | Source                                                                                                                                                                                                                            |
|---|------------------------------------------------------------------------------|-------------------------|--------------------------------|-----------------------------------------------------------------------------------------------------------------------------------------------------------------------------------------------------------------------------------|
| 1 | Brooks Rehab, Aphasia Centre, Intensive Comprehensive Aphasia Program (ICAP) | Jacksonville, Florida   | Private healthcare             | <a href="https://brooksrehab.org/services/aphasia-center/">https://brooksrehab.org/services/aphasia-center/</a>                                                                                                                   |
| 2 | S-IHP's CAP (Spaulding-IHP's Comprehensive Aphasia Program)                  | Boston, Massachusetts   | Private healthcare             | <a href="https://spauldingrehab.org/research/programs-labs/stroke-institute/patient-programs">https://spauldingrehab.org/research/programs-labs/stroke-institute/patient-programs</a>                                             |
| 3 | Monarch House Comprehensive Aphasia Program                                  | Waterloo, Ontario       | Private healthcare             | <a href="http://www.h-pcap.com/comprehensive-aphasia-program.html">http://www.h-pcap.com/comprehensive-aphasia-program.html</a>                                                                                                   |
| 4 | Rusk Rehabilitation's Intensive Comprehensive Aphasia Program                | New York                | Private healthcare             | <a href="https://nyulangone.org/locations/rusk-rehabilitation/speech-language-pathology-swallowing">https://nyulangone.org/locations/rusk-rehabilitation/speech-language-pathology-swallowing</a>                                 |
| 5 | The Aphasia Center, Intensive Treatment Program                              | St. Petersburg, Florida | Private healthcare             | <a href="https://theaphasiacenter.com/about-us/">https://theaphasiacenter.com/about-us/</a>                                                                                                                                       |
| 6 | The Craig Hospital Aphasia Therapy (CHAT) Program                            | Englewood, Colorado     | Private healthcare             | <a href="https://craighospital.org/services/speech-therapy/craig-hospital-aphasia-therapy-chat-program">https://craighospital.org/services/speech-therapy/craig-hospital-aphasia-therapy-chat-program</a>                         |
| 7 | Casa Afasia                                                                  | Almuñécar, Spain        | Private healthcare             | <a href="https://casaafasia.com/">https://casaafasia.com/</a>                                                                                                                                                                     |
| 8 | The University of Memphis Aphasia Boot Camp                                  | Memphis, Tennessee      | University clinic with cost    | <a href="https://www.memphis.edu/mshc/services/aphasiabootcamp.php">https://www.memphis.edu/mshc/services/aphasiabootcamp.php</a>                                                                                                 |
| 9 | The Queen Square Intensive Comprehensive Aphasia Programme                   | London, England         | Charity funded based in public | <a href="https://www.ucl.ac.uk/news/2019/jul/specialist-service-treat-language-difficulties-stroke-or-brain-injury">https://www.ucl.ac.uk/news/2019/jul/specialist-service-treat-language-difficulties-stroke-or-brain-injury</a> |

---

|    |                                                                    |                                  |                             |                                                                                                                                                                                                                                                                                                                                                                                                                               |
|----|--------------------------------------------------------------------|----------------------------------|-----------------------------|-------------------------------------------------------------------------------------------------------------------------------------------------------------------------------------------------------------------------------------------------------------------------------------------------------------------------------------------------------------------------------------------------------------------------------|
|    |                                                                    |                                  | healthcare system           |                                                                                                                                                                                                                                                                                                                                                                                                                               |
| 10 | Northwestern University Intensive Aphasia Program                  | Evanston, Illinois               | University clinic with cost | <a href="https://nucasll.northwestern.edu/speech-language-pathology/aphasia/intensive-treatment-services/">https://nucasll.northwestern.edu/speech-language-pathology/aphasia/intensive-treatment-services/</a>                                                                                                                                                                                                               |
| 11 | North Memorial Health Intensive Aphasia Program                    | Minneapolis, Minnesota           | Private healthcare          | <a href="https://northmemorial.com/condition/intensive-programs/">https://northmemorial.com/condition/intensive-programs/</a>                                                                                                                                                                                                                                                                                                 |
| 12 | Marquette University Intensive Aphasia Program                     | Milwaukee, Wisconsin             | University clinic with cost | <a href="https://www.marquette.edu/speech-pathology-audiology/clinic-resources.php">https://www.marquette.edu/speech-pathology-audiology/clinic-resources.php</a>                                                                                                                                                                                                                                                             |
| 13 | Loyola University Maryland Intensive Treatment for Aphasia Program | Columbia and Belvedere, Maryland | University clinic with cost | <a href="https://www.loyola.edu/department/clinical-centers/services/summer-programs/intensive-treatment-aphasia#:~:text=ITAP%20is%20an%20intensive%20treatment,per%20week%2C%20for%20several%20weeks.">https://www.loyola.edu/department/clinical-centers/services/summer-programs/intensive-treatment-aphasia#:~:text=ITAP%20is%20an%20intensive%20treatment,per%20week%2C%20for%20several%20weeks.</a>                     |
| 14 | Ability KC Intensive Comprehensive Aphasia Program                 | Kansas City, Missouri            | Private healthcare          | <a href="https://www.heart.org/-/media/files/affiliates/mwa/20th-annual-stroke-symposium-presentations/intensive-comprehensive-approaches-to-aphasia.pdf?la=en&amp;hash=0F6D02C3FABB3983AA18874D6BEC747F2204BF73">https://www.heart.org/-/media/files/affiliates/mwa/20th-annual-stroke-symposium-presentations/intensive-comprehensive-approaches-to-aphasia.pdf?la=en&amp;hash=0F6D02C3FABB3983AA18874D6BEC747F2204BF73</a> |

---
